# Supplementary material for: Identification of epidermal progenitors for the Merkel cell lineage
Source: Oxford University Press journal article supplement (doi:10.1242/dev.055970), 2010-11-02
Supplement: dev055970tables2.pdf [file dev055970tables2.pdf]

**Table S2. EdU labeling in epidermal TDs**

| EdU injections | Harvest time post EdU | TDs | EdU+ TDs (basal cells) | EdU+ TDs (Merkel cells) | EdU+ TDs (suprabasal cells) |
|----------------|-----------------------|-----|------------------------|-------------------------|-----------------------------|
| 1              | 1 hour                | 32  | 14 (44%)               | 0                       | 0                           |
|                | 16 hours              | 31  | 16 (52%)               | 0                       | 1 (3%)                      |
|                | 3 days                | 58  | 17 (29%)               | 0                       | 4 (7%)                      |
|                | 8 days                | 53  | 7 (13%)                | 0                       | 12 (23%)                    |
| 6              | 24 hours              | 109 | 99 (91%)               | 0                       | 32 (29%)                    |
|                | 3 days                | 63  | 55 (87%)               | 2 (3.2%)                | 31 (49%)                    |
|                | 8 days                | 103 | 73 (71%)               | 2 (1.9%)                | 70 (68%)                    |

Data are presented as the number of touch domes (with percentages in parentheses) containing EdU+ cells in each of three compartments: basal layer, Merkel cell and suprabasal layers.
