# Supplementary figures and images for: Identification of epidermal progenitors for the Merkel cell lineage
Source: Oxford University Press journal article supplement (doi:10.1242/dev.055970), 2010-11-02

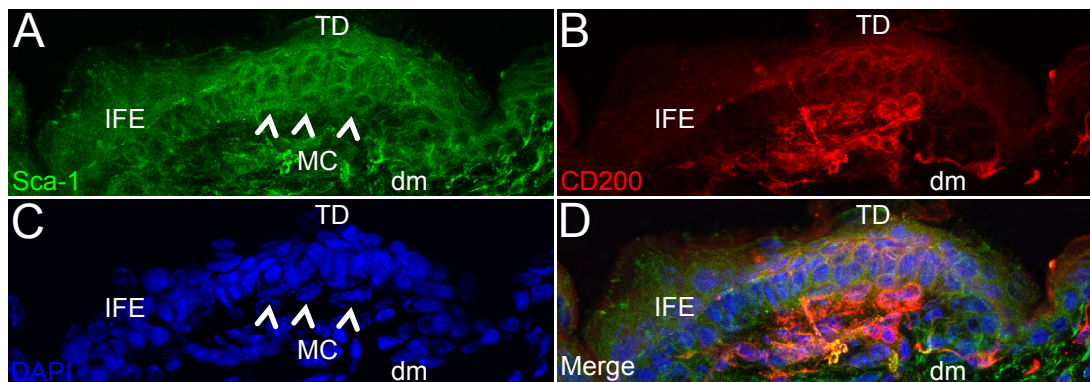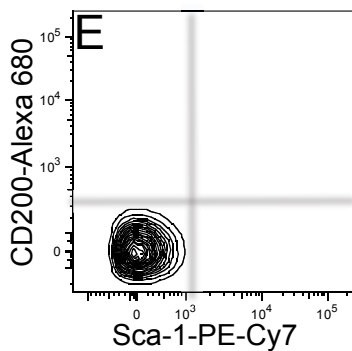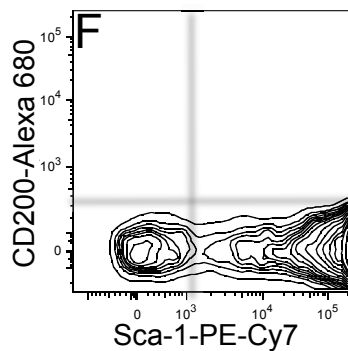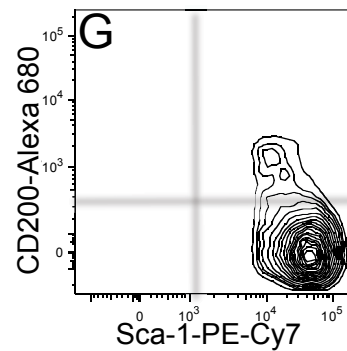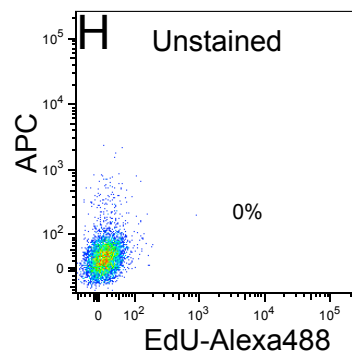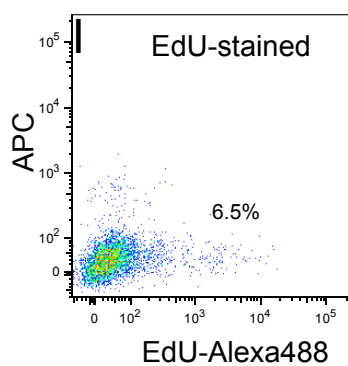

Supplement: dev055970figs1.pdf [file dev055970figs1.pdf]

Woo, Stumpfova et al., Supplemental Figure 2

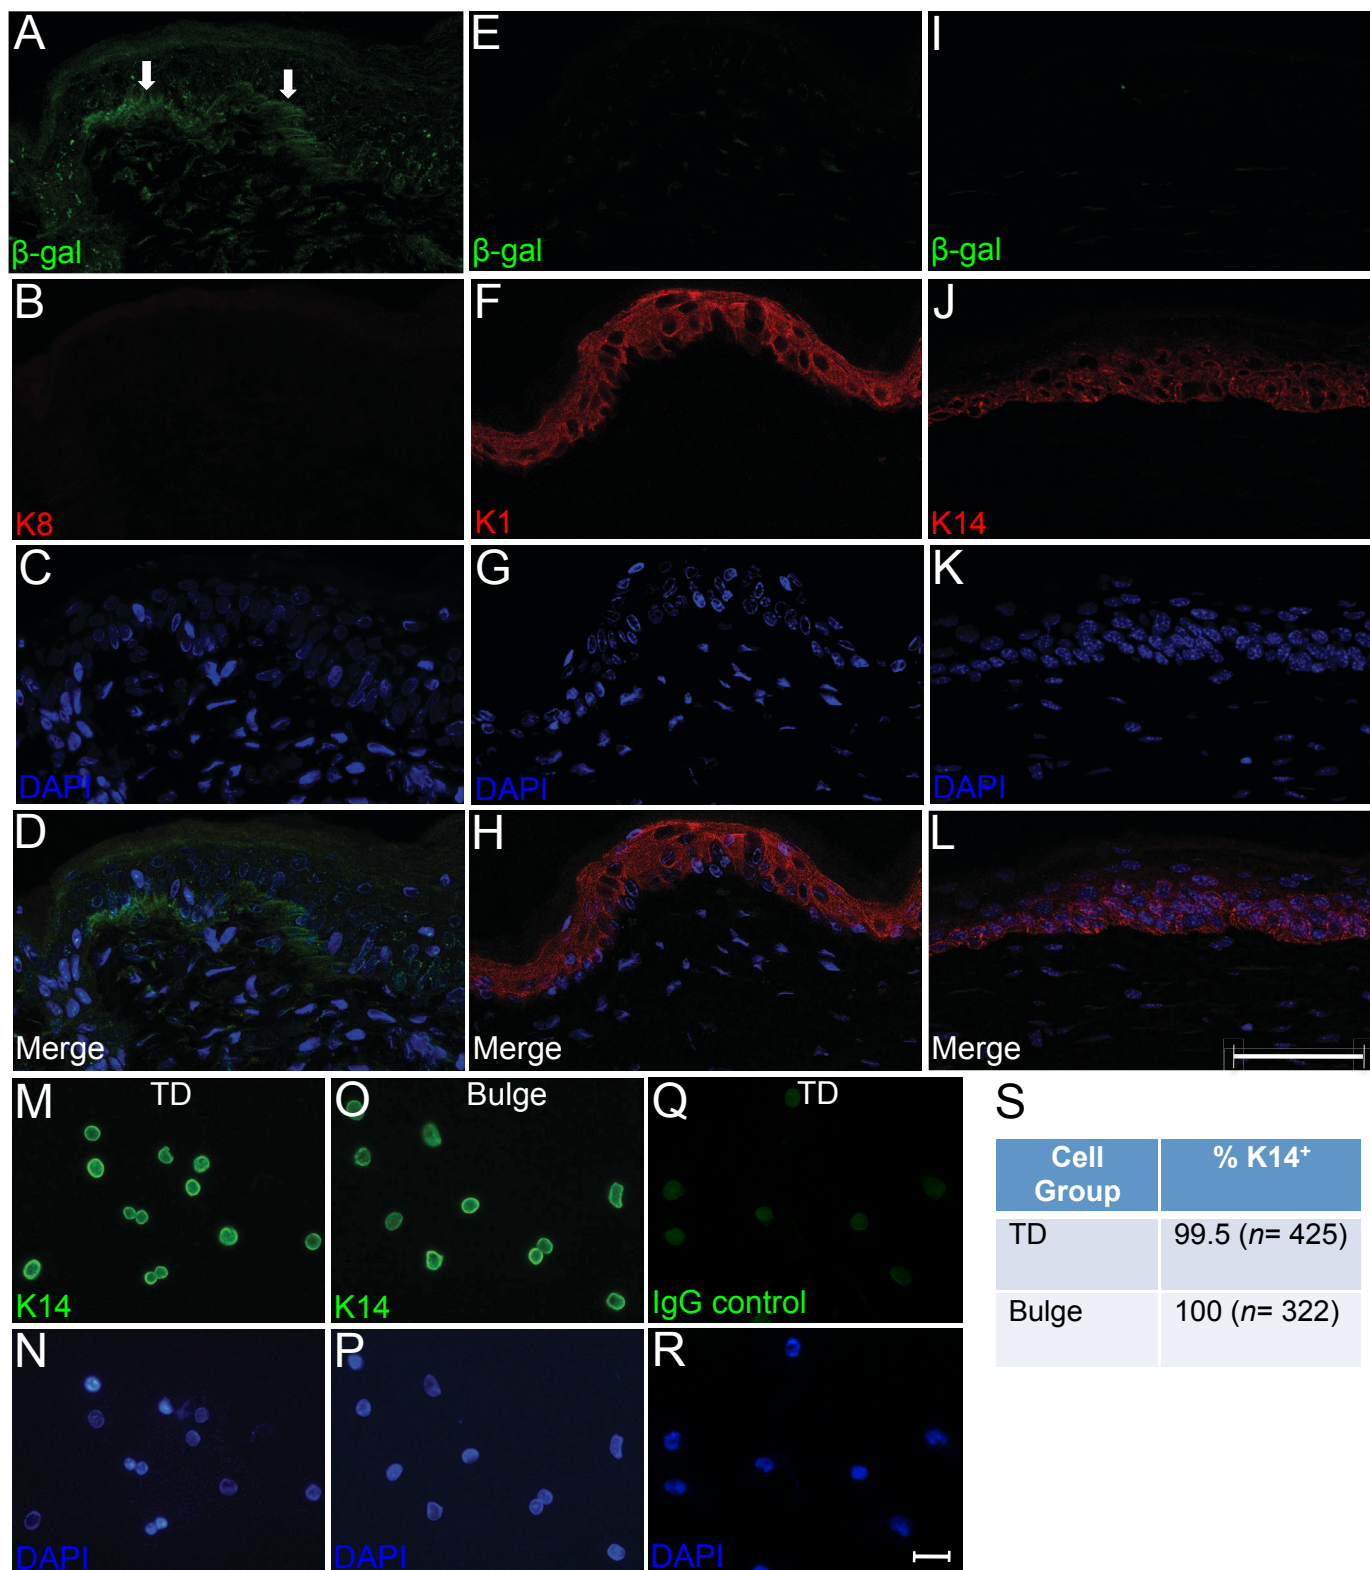

Supplement: dev055970figs2.pdf [file dev055970figs2.pdf]
